# Supplementary material for: Tunable Unexplored Luminescence in Waveguides Based on D-A-D Benzoselenadiazoles Nanofibers
Source: MDPI journal article supplement (doi:10.3390/nano14100822), 2024-05-07

# Tunable Unexplored Luminescence in Waveguides Based on D-A-D Benzosenadiazoles Nanofibers

Carlos Tardío <sup>1</sup>, Esther Pinilla-Peñalver <sup>2</sup>, Beatriz Donoso <sup>3</sup> and Iván Torres-Moya <sup>4,\*</sup>

<sup>1</sup> Department of Inorganic, Organic Chemistry and Biochemistry, Faculty of Chemical Science and Technologies, Instituto Regional de Investigación Científica Aplicada (IRICA), University of Castilla-La Mancha, 13071 Ciudad Real, Spain; [carlos.tardio@uclm.es](mailto:carlos.tardio@uclm.es)

<sup>2</sup> Department of Analytical Chemistry and Food Technology, University of Castilla-La Mancha, Avenue Camilo José Cela, s/n, 13071 Ciudad Real, Spain; [esther.pinilla@uclm.es](mailto:esther.pinilla@uclm.es)

<sup>3</sup> Department of Organic Chemistry, Faculty of Sciences, Campus of Fuentenueva, University of Granada, 18071 Granada, Spain; [beatrizdonoso@ugr.es](mailto:beatrizdonoso@ugr.es)

<sup>4</sup> Department of Organic Chemistry, Faculty of Chemical Sciences, Campus of Espinardo, University of Murcia, 30010 Murcia, Spain

\* Correspondence: [ivan.torres@um.es](mailto:ivan.torres@um.es)

Keywords: benzosenadiazoles, nanofibers, D-A-D systems, luminescence, waveguide

## 1. SEM Images

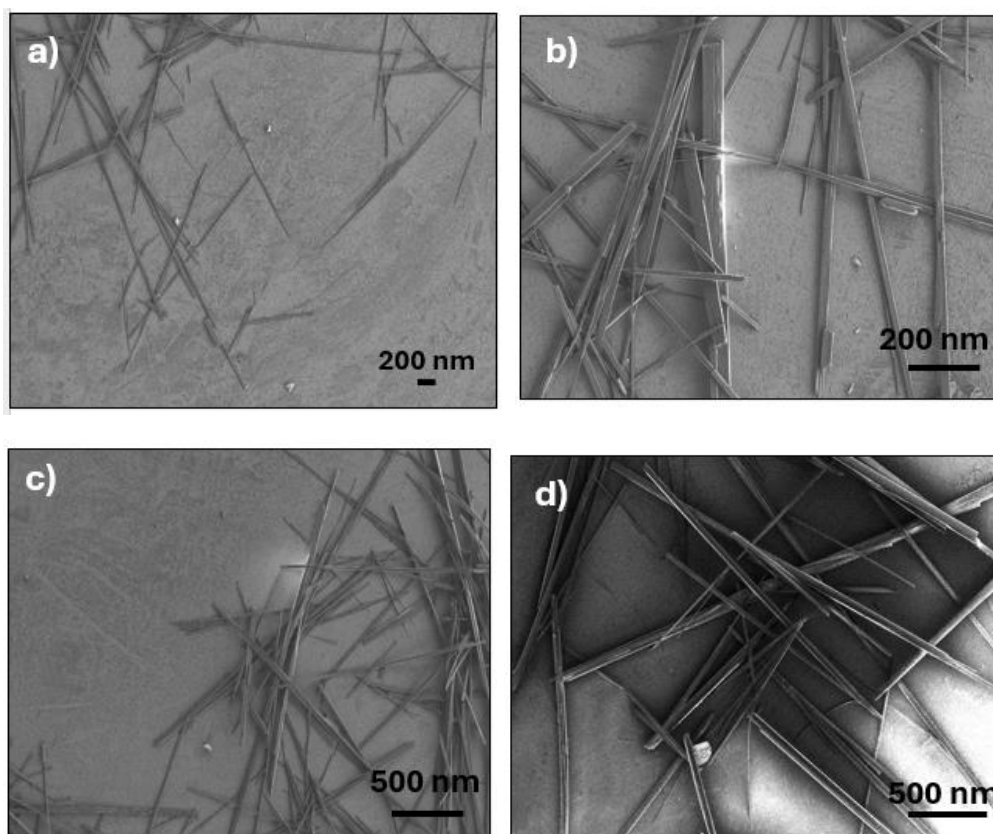

**Figure S1.** SEM images for the crystals of a) **1a** ( $\text{CHCl}_3/\text{EtOH}$ ); b) **1b** ( $\text{THF}/\text{Ethanol}$ ); c) **1c** ( $\text{THF}/\text{MeOH}$ ); d) **1d** ( $\text{CHCl}_3/\text{MeOH}$ ).

## 2. NMR spectra

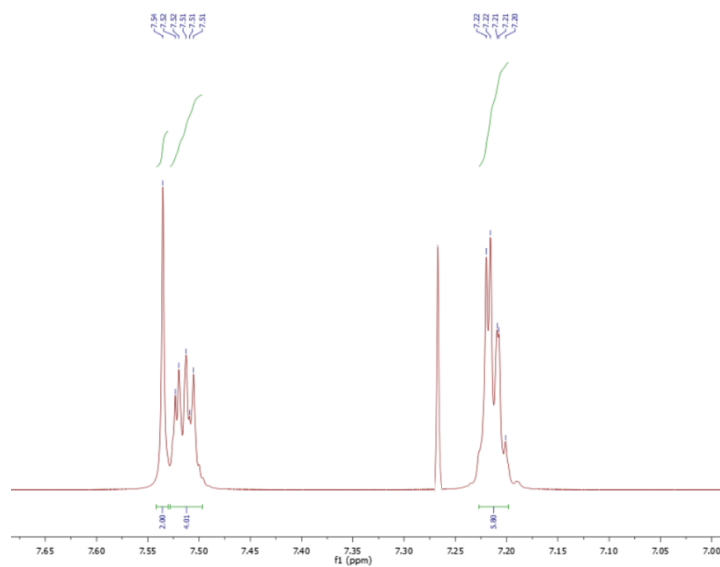

**Figure S2.**  $^1\text{H}$ -NMR spectrum of **1a**

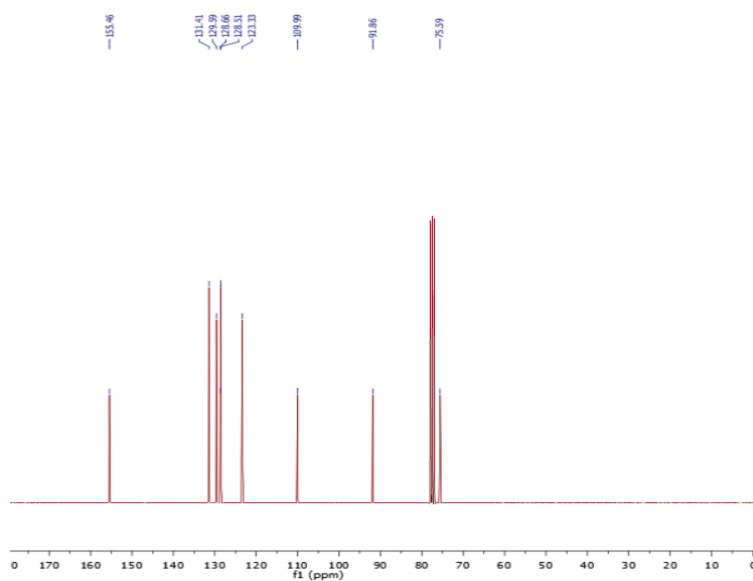

**Figure S3.**  $^{13}\text{C}$ -NMR spectrum of **1a**

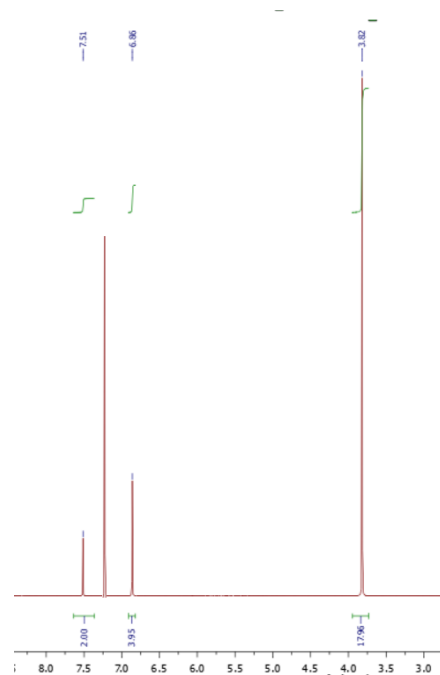

**Figure S4.** <sup>1</sup>H-NMR spectrum of **1b**

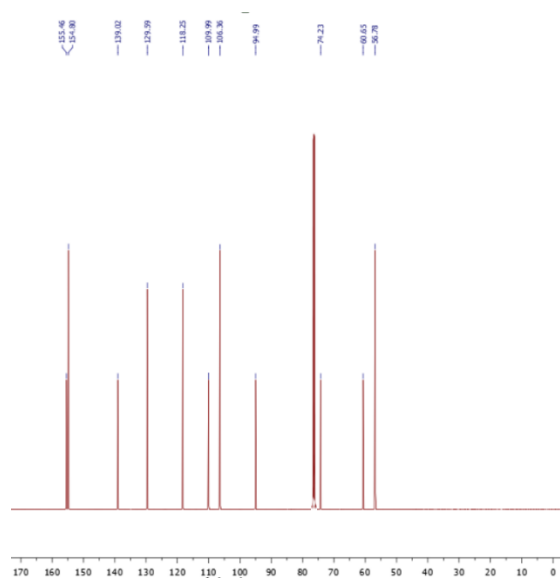

**Figure S5.** <sup>13</sup>C-NMR spectrum of **1b**

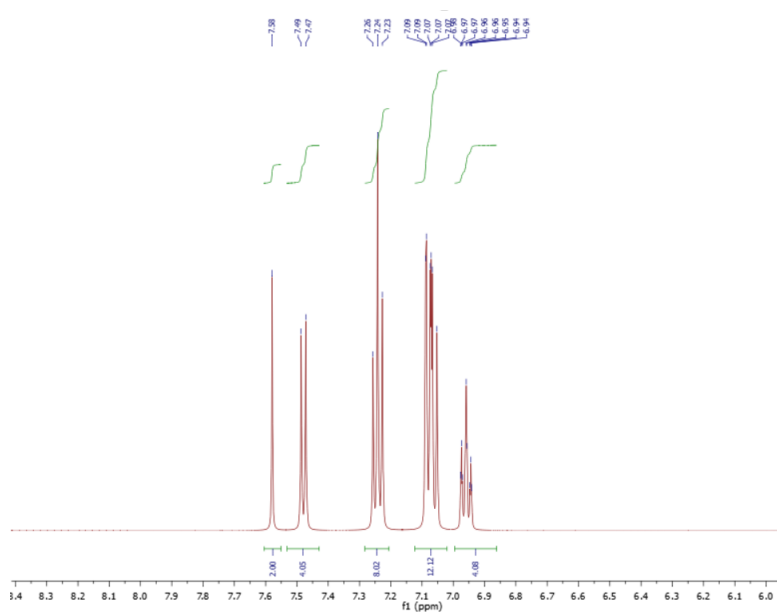

**Figure S6.** <sup>1</sup>H-NMR spectrum of **1c**

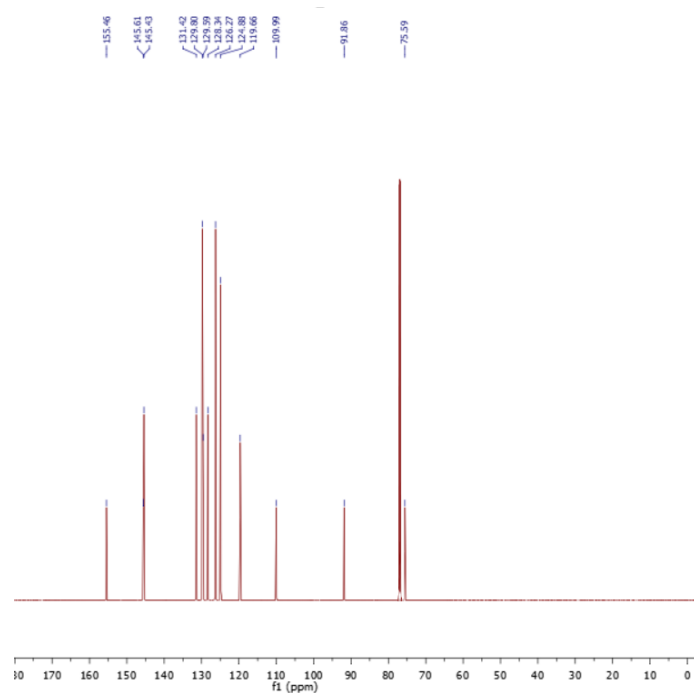

**Figure S7.** <sup>13</sup>C-NMR spectrum of **1c**

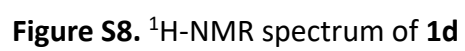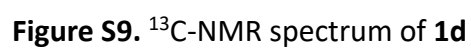

Supplement: s1 [file s1]
